# Supplementary material for: Does Environmental Aid Make a Difference? Analyzing Its Impact in Developing Countries
Source: MDPI journal article supplement (doi:10.3390/land12101953), 2023-10-22
Supplement: s1 [file s1]

**Supplementary Material 1:** Overview of Environmental Aid Provided by Donor Countries from 2012-2021: A Breakdown of Total Amounts, Top Recipients, and their Respective Contributions (in USD million).

| Donor                                            | Total Amount (USD million) | Top Recipient                | Donation by Top Donor (USD million) | Percent of Top Donation |
|--------------------------------------------------|----------------------------|------------------------------|-------------------------------------|-------------------------|
| Adaptation Fund                                  | 22.72                      | Samoa                        | 6.17                                | 8.14                    |
| African Development Bank                         | 1.37                       | Gabon                        | 1.37                                | 1.10                    |
| African Development Fund                         | 62.45                      | Angola                       | 15.53                               | 26.14                   |
| Arab Bank for Economic Development in Africa     | 15.72                      | Mozambique                   | 5.95                                | 1.30                    |
| Arab Fund (AFESD)                                | 1.70                       | Yemen                        | 1.27                                | 4.67                    |
| Arcadia Fund                                     | 41.28                      | Argentina                    | 17.30                               | 8.15                    |
| Arcus Foundation                                 | 51.65                      | Indonesia                    | 13.28                               | 0.88                    |
| Asian Development Bank                           | 63.45                      | China (People's Republic of) | 32.83                               | 1.33                    |
| Australia                                        | 260.78                     | Indonesia                    | 48.27                               | 3.18                    |
| Austria                                          | 16.00                      | Moldova                      | 2.60                                | 14.80                   |
| Belgium                                          | 136.75                     | Viet Nam                     | 40.35                               | 2.26                    |
| Bernard van Leer Foundation                      | 0.12                       | Jordan                       | 0.04                                | 0.02                    |
| Bezos Earth Fund                                 | 217.92                     | Congo                        | 30.85                               | 35.05                   |
| Bill & Melinda Gates Foundation                  | 1.72                       | Tanzania                     | 1.47                                | 0.37                    |
| Bloomberg Family Foundation                      | 0.12                       | India                        | 0.12                                | 0.01                    |
| Canada                                           | 191.75                     | Ethiopia                     | 18.77                               | 3.25                    |
| Carnegie Corporation of New York                 | 0.21                       | China (People's Republic of) | 0.21                                | 0.01                    |
| Central American Bank for Economic Integration   | 2.76                       | Honduras                     | 2.76                                | 1.59                    |
| Charity Projects Ltd (Comic Relief)              | 0.02                       | Zimbabwe                     | 0.02                                | 0.02                    |
| Children's Investment Fund Foundation            | 63.31                      | China (People's Republic of) | 29.42                               | 1.19                    |
| Citi Foundation                                  | 0.45                       | Indonesia                    | 0.25                                | 0.02                    |
| Climate Investment Funds                         | 691.01                     | Morocco                      | 234.12                              | 45.98                   |
| Croatia                                          | 0.26                       | Albania                      | 0.26                                | 0.24                    |
| Czech Republic                                   | 8.57                       | Mongolia                     | 2.42                                | 1.07                    |
| David & Lucile Packard Foundation                | 94.35                      | Indonesia                    | 49.92                               | 3.29                    |
| Denmark                                          | 429.78                     | Kenya                        | 137.89                              | 15.76                   |
| Dutch Postcode Lottery                           | 17.79                      | Chad                         | 3.91                                | 3.56                    |
| Estonia                                          | 1.73                       | Afghanistan                  | 0.50                                | 0.34                    |
| EU Institutions                                  | 2,419.61                   | Türkiye                      | 630.10                              | 45.66                   |
| European Bank for Reconstruction and Development | 25.18                      | Albania                      | 25.18                               | 23.20                   |
| Finland                                          | 57.07                      | Nepal                        | 10.36                               | 2.98                    |
| Food and Agriculture Organisation                | 7.58                       | Botswana                     | 0.55                                | 1.99                    |
| Ford Foundation                                  | 8.76                       | Brazil                       | 1.34                                | 0.05                    |
| France                                           | 4,720.12                   | Colombia                     | 1,079.99                            | 42.14                   |
| German Postcode Lottery                          | 1.14                       | Mozambique                   | 0.71                                | 0.15                    |
| Germany                                          | 4,299.14                   | Colombia                     | 652.06                              | 25.44                   |
| Global Environment Facility                      | 3,271.28                   | China (People's Republic of) | 328.44                              | 13.34                   |
| Global Green Growth Institute                    | 63.26                      | Indonesia                    | 8.45                                | 0.56                    |
| Gordon and Betty Moore Foundation                | 146.84                     | Brazil                       | 59.51                               | 2.25                    |
| Greece                                           | 0.00                       | Albania                      | 0.00                                | 0.00                    |
| Green Climate Fund                               | 26.22                      | Ecuador                      | 8.85                                | 1.77                    |
| H&M Foundation                                   | 0.29                       | Bangladesh                   | 0.29                                | 0.05                    |
| Howard G. Buffett Foundation                     | 12.29                      | Rwanda                       | 12.29                               | 8.40                    |
| Hungary                                          | 0.88                       | Montenegro                   | 0.29                                | 0.72                    |
| Iceland                                          | 0.33                       | Uganda                       | 0.18                                | 0.08                    |
| IKEA Foundation                                  | 30.83                      | India                        | 10.45                               | 0.70                    |
| Inter-American Development Bank                  | 1,490.01                   | Bolivia                      | 303.19                              | 53.95                   |

|                                                       |          |                                  |          |       |
|-------------------------------------------------------|----------|----------------------------------|----------|-------|
| International Bank for Reconstruction and Development | 2,443.95 | Turkey                           | 390.18   | 28.27 |
| International Development Association                 | 1,483.04 | India                            | 208.06   | 13.93 |
| International Labour Organisation                     | 1.16     | Argentina                        | 0.12     | 0.05  |
| Ireland                                               | 20.14    | Mozambique                       | 5.13     | 1.12  |
| Italy                                                 | 135.22   | Mozambique                       | 14.51    | 3.17  |
| Japan                                                 | 1,488.00 | Viet Nam                         | 652.09   | 36.51 |
| John D. & Catherine T. MacArthur Foundation           | 36.43    | India                            | 12.08    | 0.81  |
| Korea                                                 | 303.14   | Mongolia                         | 76.97    | 34.13 |
| Kuwait                                                | 14.60    | China (People's Republic of)     | 11.76    | 0.48  |
| Latvia                                                | 0.02     | Uzbekistan                       | 0.02     | 0.01  |
| Laudes Foundation                                     | 0.39     | Pakistan                         | 0.12     | 0.05  |
| Liechtenstein                                         | 0.09     | Zimbabwe                         | 0.09     | 0.09  |
| Lithuania                                             | 0.25     | Georgia                          | 0.08     | 0.09  |
| Luxembourg                                            | 8.89     | Mali                             | 2.63     | 1.48  |
| Margaret A. Cargill Foundation                        | 23.64    | Brazil                           | 6.14     | 0.23  |
| MAVA Foundation                                       | 141.53   | Guinea-Bissau                    | 18.51    | 42.01 |
| Montreal Protocol                                     | 51.35    | China (People's Republic of)     | 42.49    | 1.73  |
| Netherlands                                           | 91.65    | Kenya                            | 24.19    | 2.77  |
| New Zealand                                           | 18.60    | Tuvalu                           | 8.15     | 27.01 |
| Nordic Development Fund                               | 12.55    | Honduras                         | 8.56     | 4.92  |
| Norway                                                | 2,720.75 | Brazil                           | 1,204.24 | 45.59 |
| Oak Foundation                                        | 47.82    | Brazil                           | 9.50     | 0.36  |
| Omidyar Network Fund, Inc.                            | 3.22     | India                            | 2.39     | 0.16  |
| OPEC Fund for International Development               | 1.26     | Côte d'Ivoire                    | 1.02     | 1.30  |
| OSCE                                                  | 32.23    | Kyrgyzstan                       | 8.57     | 16.62 |
| People's Postcode Lottery                             | 0.22     | Zambia                           | 0.15     | 0.08  |
| Poland                                                | 2.14     | Ukraine                          | 0.54     | 0.26  |
| Portugal                                              | 7.12     | Sao Tome and Principe            | 2.37     | 8.76  |
| Qatar                                                 | 0.14     | South Africa                     | 0.14     | 0.03  |
| Rockefeller Foundation                                | 0.62     | Costa Rica                       | 0.38     | 0.07  |
| Romania                                               | 0.04     | Palau                            | 0.02     | 0.12  |
| Saudi Arabia                                          | 14.54    | China (People's Republic of)     | 14.54    | 0.59  |
| Slovak Republic                                       | 0.36     | Moldova                          | 0.15     | 0.88  |
| Slovenia                                              | 2.48     | Bosnia and Herzegovina           | 0.95     | 2.19  |
| Spain                                                 | 52.98    | Peru                             | 8.37     | 0.93  |
| Sweden                                                | 450.17   | Mozambique                       | 44.18    | 9.64  |
| Swedish Postcode Lottery                              | 7.65     | Democratic Republic of the Congo | 0.64     | 0.11  |
| Switzerland                                           | 330.03   | Bolivia                          | 53.14    | 9.46  |
| Türkiye                                               | 19.30    | Djibouti                         | 15.22    | 44.49 |
| UBS Optimus Foundation                                | 3.83     | Brazil                           | 0.63     | 0.02  |
| UN Peacebuilding Fund                                 | 10.04    | Chad                             | 2.40     | 2.19  |
| UNDP                                                  | 345.14   | Niger                            | 25.64    | 22.80 |
| UNECE                                                 | 0.68     | Kazakhstan                       | 0.68     | 0.81  |
| UNFPA                                                 | 0.74     | Bangladesh                       | 0.09     | 0.01  |
| UNICEF                                                | 18.30    | Madagascar                       | 6.20     | 1.79  |
| United Arab Emirates                                  | 29.98    | Chad                             | 11.04    | 10.07 |
| United Kingdom                                        | 1,735.51 | Kenya                            | 218.71   | 25.00 |
| United Nations Industrial Development Organization    | 0.00     | Egypt                            | 0.00     | 0.00  |
| United States                                         | 3,658.68 | Indonesia                        | 311.04   | 20.52 |
| Wellcome Trust                                        | 0.03     | India                            | 0.03     | 0.00  |
| William & Flora Hewlett Foundation                    | 25.55    | China (People's Republic of)     | 14.48    | 0.59  |
| WTO - International Trade Centre                      | 0.07     | Ghana                            | 0.04     | 0.03  |

**Supplementary Material 2: Overview of Environmental Aid Received by Developing Countries from 2012-2021: A Breakdown of Total Amounts, Leading Donors, and their Respective Contributions (in USD million).**

| Recipient                             | Total Amount (USD million) | Top Donor                                             | Donation by Top Donor (USD million) | Percent of Top Donation |
|---------------------------------------|----------------------------|-------------------------------------------------------|-------------------------------------|-------------------------|
| Afghanistan                           | 147.73                     | International Development Association                 | 79.96                               | 54.13                   |
| Albania                               | 108.55                     | European Bank for Reconstruction and Development      | 25.18                               | 23.20                   |
| Algeria                               | 84.33                      | Germany                                               | 30.30                               | 35.93                   |
| Angola                                | 59.43                      | Global Environment Facility                           | 26.82                               | 45.14                   |
| Antigua and Barbuda                   | 5.36                       | Global Environment Facility                           | 3.72                                | 69.28                   |
| Argentina                             | 212.37                     | International Bank for Reconstruction and Development | 107.02                              | 50.39                   |
| Armenia                               | 113.07                     | Germany                                               | 57.15                               | 50.54                   |
| Asia, regional                        | 743.71                     | Germany                                               | 152.56                              | 20.51                   |
| Azerbaijan                            | 22.80                      | Global Environment Facility                           | 14.28                               | 62.64                   |
| Bangladesh                            | 594.71                     | United States                                         | 155.31                              | 26.12                   |
| Belarus                               | 54.17                      | EU Institutions                                       | 27.94                               | 51.58                   |
| Belize                                | 40.88                      | Global Environment Facility                           | 12.19                               | 29.82                   |
| Benin                                 | 125.80                     | Germany                                               | 46.11                               | 36.65                   |
| Bhutan                                | 63.77                      | Global Environment Facility                           | 19.05                               | 29.87                   |
| Bolivia                               | 561.94                     | Inter-American Development Bank                       | 303.19                              | 53.95                   |
| Bosnia and Herzegovina                | 43.51                      | Sweden                                                | 18.33                               | 42.14                   |
| Botswana                              | 27.59                      | Global Environment Facility                           | 13.46                               | 48.80                   |
| Brazil                                | 2,641.74                   | Norway                                                | 1,204.24                            | 45.59                   |
| Burkina Faso                          | 102.47                     | Global Environment Facility                           | 13.89                               | 13.55                   |
| Burundi                               | 44.87                      | International Development Association                 | 18.62                               | 41.50                   |
| Cabo Verde                            | 49.16                      | MAVA Foundation                                       | 13.36                               | 27.18                   |
| Cambodia                              | 261.80                     | United States                                         | 95.14                               | 36.34                   |
| Cameroon                              | 161.07                     | Germany                                               | 45.83                               | 28.46                   |
| Central African Republic              | 40.86                      | EU Institutions                                       | 23.07                               | 56.47                   |
| Chad                                  | 109.63                     | EU Institutions                                       | 44.32                               | 40.43                   |
| Chile                                 | 51.46                      | Global Environment Facility                           | 17.64                               | 34.27                   |
| China (People's Republic of)          | 2,462.76                   | Germany                                               | 470.93                              | 19.12                   |
| Colombia                              | 2,563.03                   | France                                                | 1,079.99                            | 42.14                   |
| Comoros                               | 25.03                      | Global Environment Facility                           | 11.40                               | 45.53                   |
| Congo                                 | 88.02                      | Bezos Earth Fund                                      | 30.85                               | 35.05                   |
| Cook Islands                          | 11.66                      | Global Environment Facility                           | 7.33                                | 62.87                   |
| Costa Rica                            | 532.57                     | Inter-American Development Bank                       | 267.37                              | 50.20                   |
| Cuba                                  | 67.88                      | Global Environment Facility                           | 28.16                               | 41.49                   |
| Côte d'Ivoire                         | 78.71                      | Germany                                               | 33.26                               | 42.25                   |
| Democratic People's Republic of Korea | 1.33                       | EU Institutions                                       | 0.38                                | 28.59                   |
| Democratic Republic of the Congo      | 609.38                     | Germany                                               | 203.58                              | 33.41                   |
| Djibouti                              | 34.21                      | Turkey                                                | 15.22                               | 44.49                   |
| Dominica                              | 25.41                      | Inter-American Development Bank                       | 12.19                               | 47.99                   |
| Dominican Republic                    | 78.44                      | United States                                         | 27.01                               | 34.44                   |
| Ecuador                               | 499.38                     | France                                                | 163.26                              | 32.69                   |
| Egypt                                 | 506.53                     | International Bank for Reconstruction and Development | 153.95                              | 30.39                   |
| El Salvador                           | 236.66                     | Inter-American Development Bank                       | 207.99                              | 87.89                   |
| Equatorial Guinea                     | 6.96                       | Global Environment Facility                           | 4.21                                | 60.54                   |
| Eritrea                               | 13.26                      | Global Environment Facility                           | 9.84                                | 74.25                   |
| Eswatini                              | 12.42                      | Global Environment Facility                           | 10.38                               | 83.57                   |
| Ethiopia                              | 576.89                     | Norway                                                | 141.13                              | 24.46                   |
| Fiji                                  | 74.73                      | Global Environment Facility                           | 36.09                               | 48.29                   |
| Gabon                                 | 124.18                     | United States                                         | 38.05                               | 30.64                   |
| Gambia                                | 38.23                      | Global Environment Facility                           | 24.04                               | 62.90                   |

|                                  |          |                                                       |        |       |
|----------------------------------|----------|-------------------------------------------------------|--------|-------|
| Georgia                          | 86.72    | United States                                         | 20.60  | 23.76 |
| Ghana                            | 134.98   | United States                                         | 27.06  | 20.05 |
| Grenada                          | 40.62    | International Development Association                 | 21.06  | 51.85 |
| Guatemala                        | 316.68   | Inter-American Development Bank                       | 153.06 | 48.33 |
| Guinea                           | 56.88    | Global Environment Facility                           | 22.42  | 39.41 |
| Guinea-Bissau                    | 44.07    | MAVA Foundation                                       | 18.51  | 42.01 |
| Guyana                           | 214.42   | Norway                                                | 164.38 | 76.66 |
| Haiti                            | 209.42   | United States                                         | 98.93  | 47.24 |
| Honduras                         | 173.98   | United States                                         | 55.65  | 31.99 |
| India                            | 1,493.30 | International Development Association                 | 208.06 | 13.93 |
| Indonesia                        | 1,516.08 | Norway                                                | 368.88 | 24.33 |
| Iran                             | 58.55    | Japan                                                 | 32.86  | 56.13 |
| Iraq                             | 20.97    | Italy                                                 | 8.12   | 38.73 |
| Jamaica                          | 76.62    | United States                                         | 42.36  | 55.28 |
| Jordan                           | 166.92   | United States                                         | 43.74  | 26.20 |
| Kazakhstan                       | 84.03    | Global Environment Facility                           | 47.41  | 56.42 |
| Kenya                            | 874.74   | United Kingdom                                        | 218.71 | 25.00 |
| Kiribati                         | 20.40    | Global Environment Facility                           | 7.63   | 37.42 |
| Kosovo                           | 34.02    | Sweden                                                | 9.44   | 27.75 |
| Kyrgyzstan                       | 51.58    | International Development Association                 | 11.99  | 23.24 |
| Lao People's Democratic Republic | 183.75   | International Development Association                 | 58.67  | 31.93 |
| Lebanon                          | 93.97    | International Bank for Reconstruction and Development | 26.36  | 28.05 |
| Lesotho                          | 19.15    | Global Environment Facility                           | 17.12  | 89.39 |
| Liberia                          | 156.39   | Norway                                                | 65.81  | 42.08 |
| Libya                            | 1.04     | United States                                         | 0.85   | 81.69 |
| Madagascar                       | 345.71   | Germany                                               | 167.55 | 48.46 |
| Malawi                           | 248.16   | United States                                         | 87.41  | 35.22 |
| Malaysia                         | 84.89    | Global Environment Facility                           | 32.85  | 38.70 |
| Maldives                         | 25.43    | EU Institutions                                       | 8.87   | 34.89 |
| Mali                             | 177.42   | Global Environment Facility                           | 42.79  | 24.12 |
| Marshall Islands                 | 10.87    | Australia                                             | 3.90   | 35.85 |
| Mauritania                       | 141.05   | Germany                                               | 79.62  | 56.45 |
| Mauritius                        | 61.28    | France                                                | 37.04  | 60.45 |
| Mexico                           | 1,695.00 | France                                                | 775.66 | 45.76 |
| Micronesia                       | 24.54    | United States                                         | 6.01   | 24.49 |
| Moldova                          | 17.56    | Sweden                                                | 5.48   | 31.22 |
| Mongolia                         | 225.51   | Korea                                                 | 76.97  | 34.13 |
| Montenegro                       | 40.10    | EU Institutions                                       | 18.80  | 46.89 |
| Montserrat                       | 5.18     | United Kingdom                                        | 5.00   | 96.58 |
| Morocco                          | 509.15   | Climate Investment Funds                              | 234.12 | 45.98 |
| Mozambique                       | 458.50   | United States                                         | 75.80  | 16.53 |
| Myanmar                          | 165.22   | International Development Association                 | 42.10  | 25.48 |
| Namibia                          | 133.54   | Germany                                               | 94.26  | 70.59 |
| Nauru                            | 6.97     | Australia                                             | 4.03   | 57.85 |
| Nepal                            | 348.01   | United Kingdom                                        | 149.93 | 43.08 |
| Nicaragua                        | 100.95   | Switzerland                                           | 46.99  | 46.54 |
| Niger                            | 112.47   | Climate Investment Funds                              | 31.89  | 28.35 |
| Nigeria                          | 196.96   | International Development Association                 | 107.06 | 54.36 |
| Niue                             | 8.49     | Australia                                             | 4.63   | 54.56 |
| North Macedonia                  | 103.72   | EU Institutions                                       | 74.50  | 71.83 |
| Pakistan                         | 249.02   | International Development Association                 | 69.32  | 27.84 |
| Palau                            | 19.35    | Japan                                                 | 9.65   | 49.84 |
| Panama                           | 157.29   | International Bank for Reconstruction and Development | 81.93  | 52.09 |
| Papua New Guinea                 | 80.00    | Australia                                             | 39.16  | 48.95 |
| Paraguay                         | 46.12    | Global Environment Facility                           | 18.26  | 39.60 |
| Peru                             | 902.60   | United States                                         | 208.54 | 23.10 |
| Philippines                      | 491.30   | United States                                         | 225.52 | 45.90 |
| Rwanda                           | 146.42   | United States                                         | 28.00  | 19.12 |
| Saint Helena                     | 54.78    | United Kingdom                                        | 54.72  | 99.91 |
| Saint Kitts and Nevis            | 0.79     | Global Environment Facility                           | 0.76   | 95.42 |
| Saint Lucia                      | 9.56     | Global Environment Facility                           | 4.61   | 48.24 |

|                                  |          |                                       |        |       |
|----------------------------------|----------|---------------------------------------|--------|-------|
| Saint Vincent and the Grenadines | 13.16    | International Development Association | 8.16   | 62.05 |
| Samoa                            | 75.77    | Climate Investment Funds              | 33.63  | 44.38 |
| Sao Tome and Principe            | 27.04    | Global Environment Facility           | 16.73  | 61.86 |
| Senegal                          | 267.31   | EU Institutions                       | 76.57  | 28.65 |
| Serbia                           | 129.63   | Germany                               | 33.51  | 25.85 |
| Seychelles                       | 13.53    | Global Environment Facility           | 8.90   | 65.78 |
| Sierra Leone                     | 56.49    | Global Environment Facility           | 17.78  | 31.47 |
| Solomon Islands                  | 50.59    | United States                         | 22.94  | 45.34 |
| Somalia                          | 108.56   | United Kingdom                        | 36.51  | 33.63 |
| South Africa                     | 429.86   | France                                | 155.76 | 36.24 |
| South Sudan                      | 48.78    | United States                         | 30.38  | 62.27 |
| Sri Lanka                        | 122.61   | United Kingdom                        | 33.97  | 27.70 |
| States Ex-Yugoslavia unspecified | 6.87     | MAVA Foundation                       | 5.34   | 77.68 |
| Sudan                            | 79.02    | United Kingdom                        | 27.13  | 34.34 |
| Suriname                         | 25.00    | Global Environment Facility           | 8.80   | 35.18 |
| Syrian Arab Republic             | 3.43     | Germany                               | 1.53   | 44.50 |
| Tajikistan                       | 51.27    | International Development Association | 11.84  | 23.10 |
| Tanzania                         | 392.91   | United States                         | 95.28  | 24.25 |
| Thailand                         | 111.29   | Global Environment Facility           | 22.96  | 20.63 |
| Timor-Leste                      | 43.57    | Global Environment Facility           | 16.59  | 38.08 |
| Togo                             | 51.25    | Global Environment Facility           | 17.10  | 33.37 |
| Tokelau                          | 0.50     | Australia                             | 0.29   | 58.89 |
| Tonga                            | 40.33    | Climate Investment Funds              | 31.85  | 78.98 |
| Tunisia                          | 197.79   | France                                | 88.71  | 44.85 |
| Turkmenistan                     | 12.88    | Global Environment Facility           | 7.98   | 61.93 |
| Tuvalu                           | 30.16    | Global Environment Facility           | 9.73   | 32.24 |
| Turkey                           | 1,380.11 | EU Institutions                       | 630.10 | 45.66 |
| Uganda                           | 225.89   | United States                         | 66.00  | 29.22 |
| Ukraine                          | 209.17   | United States                         | 52.21  | 24.96 |
| Uruguay                          | 52.66    | Inter-American Development Bank       | 26.41  | 50.16 |
| Uzbekistan                       | 237.32   | France                                | 180.05 | 75.87 |
| Vanuatu                          | 26.46    | Global Environment Facility           | 13.85  | 52.34 |
| Venezuela                        | 25.25    | Global Environment Facility           | 13.29  | 52.62 |
| Viet Nam                         | 1,786.11 | Japan                                 | 652.09 | 36.51 |
| Wallis and Futuna                | 6.58     | France                                | 6.58   | 99.99 |
| West Bank and Gaza Strip         | 32.69    | Japan                                 | 10.74  | 32.85 |
| Yemen                            | 27.21    | Global Environment Facility           | 13.00  | 47.75 |
| Zambia                           | 175.31   | United States                         | 70.39  | 40.15 |
| Zimbabwe                         | 94.65    | United Kingdom                        | 49.52  | 52.32 |
